# Supplementary material
Source: Research Square preprint supplement (doi:10.21203/rs.3.rs-8442341/v1)
Supplement: Supplementary file 1 [file 239dc0301759fc287f359275.pdf]

Supplementary: INSIGHT: Spatially resolved survival modelling from routine histology crosslinked with molecular profiling reveals prognostic epithelial-immune axes in stage II/III colorectal cancer

| <b>Variable</b> | <b>Group</b> | <b>TCGA+SR386<br/>(n=678)</b> | <b>PETACC3<br/>(n=1155)</b> | <b>Janssen<br/>(n=80)</b> | <b>IMMUcan<br/>(n=15)</b> | <b>Orion<br/>(n=27)</b> |
|-----------------|--------------|-------------------------------|-----------------------------|---------------------------|---------------------------|-------------------------|
| Age,years       |              | 68 (59-76)                    | 60 (53-67)                  | 68 (62-78)                | 72 (51-83)                | 60 (48-72)              |
| Sex             |              |                               |                             |                           |                           |                         |
|                 | Male         | 355 (52%)                     | 643 (56%)                   | 19 (24%)                  | 7 (47%)                   | 13 (48%)                |
|                 | Female       | 332 (48%)                     | 512 (44%)                   | 16 (20%)                  | 8 (53 %)                  | 14 (52%)                |
|                 | Missing      | 0 (0%)                        | 0 (0%)                      | 45 (56%)                  | 0 (0 %)                   | 0 (0)                   |
| MSI Status      |              |                               |                             |                           |                           |                         |
|                 | MSS          | 593 (87%)                     | 939 (81%)                   | 65 (81%)                  | 5 (33%)                   | 20 (74%)                |
|                 | MSI High     | 79 (12%)                      | 140 (12%)                   | 14 (18%)                  | 10 (67%)                  | 3 (11%)                 |
|                 | Missing      | 6 (1%)                        | 76 (7%)                     | 1 (1%)                    | 0 (0%)                    | 4 (15%)                 |
| Stage           |              |                               |                             |                           |                           |                         |
|                 | Stage 1      | 0 (0%)                        | 0 (0%)                      | 4 (5%)                    | 1 (7%)                    | 0 (0%)                  |
|                 | Stage 2      | 332 (49%)                     | 345 (30%)                   | 19 (24%)                  | 8 (53%)                   | 9 (33%)                 |
|                 | Stage 3      | 346 (51%)                     | 810 (70%)                   | 10 (13%)                  | 6 (40%)                   | 18 (67%)                |
|                 | Stage 4      | 0 (0)                         | 0 (0%)                      | 2 (2%)                    | 0 (0%)                    | 0 (0%)                  |
|                 | Missing      | 0 (0%)                        | 0 (0%)                      | 45 (56%)                  | 0 (0%)                    | 0 (0%)                  |

Table 1: Characteristics of the datasets used in this paper. For age we report its median and Inter Quartile Range (IQR). For remaining variable we report total patient counts of each subgroup as well as their overall percentage.

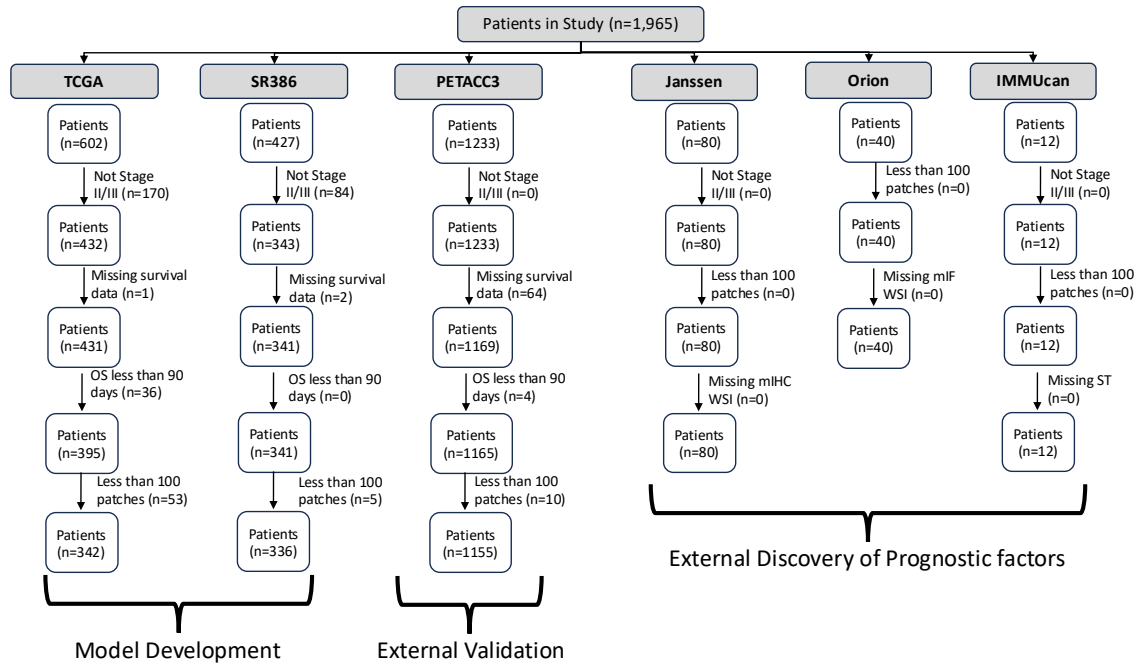

Figure 1: CONSORT diagram of all datasets used in this study as well as the filtering criteria used to exclude patients.

| Variable   | Group     | TCGA+SR386       |         | PETACC3          |         |
|------------|-----------|------------------|---------|------------------|---------|
|            |           | HR (95% CI)      | p-value | HR (95% CI)      | p-value |
| Stage      | Stage II  | ref.             |         | ref.             |         |
|            | Stage III | 2.31 (1.55-3.47) | p<0.005 | 2.58 (1.6-3.98)  | p<0.005 |
| MSI-status | MSS       | ref.             |         | ref.             |         |
|            | MSI High  | 0.67 (0.34-1.33) | p=0.25  | 0.68 (0.32-1.46) | p=0.33  |
| Sex        | Female    | ref.             |         | ref.             |         |
|            | Male      | 1.04 (0.7-1.51)  | p=0.84  | 1.27 (0.93-1.74) | p=0.14  |
| Age        | >60       | ref.             |         | ref.             |         |
|            | ≤60       | 0.59 (0.37-0.94) | p=0.03  | 0.68 (0.50-0.93) | p=0.01  |

Table 2: Hazard ratio between different subpopulations within training set (TCGA+SR386) and external validation set (PETACC3). Here we report the hazard ratio (HR) with its 95% confidence interval (CI) as well as the log-rank p-value.
